# Supplementary material for: Studies on the Two Thymine Residues in the Catalytic Core of 10-23 DNAzyme: The Impact on the Catalysis of Their 5-Substituted Functional Groups
Source: PubMed Central journal article supplement (PMC6152017; doi:10.3390/molecules22071011), 2017-06-22
Supplement: molecules-22-01011-s001.pdf [file molecules-22-01011-s001.pdf]

Supplementary Materials

**Studies on the Two Thymine Residues in the Catalytic Core of 10-23 DNAzyme: the Impact on Catalysis of Their 5-Substituted Functional Groups**

Pengyu Li, ShanShan Du, Yang Li, Junlin He

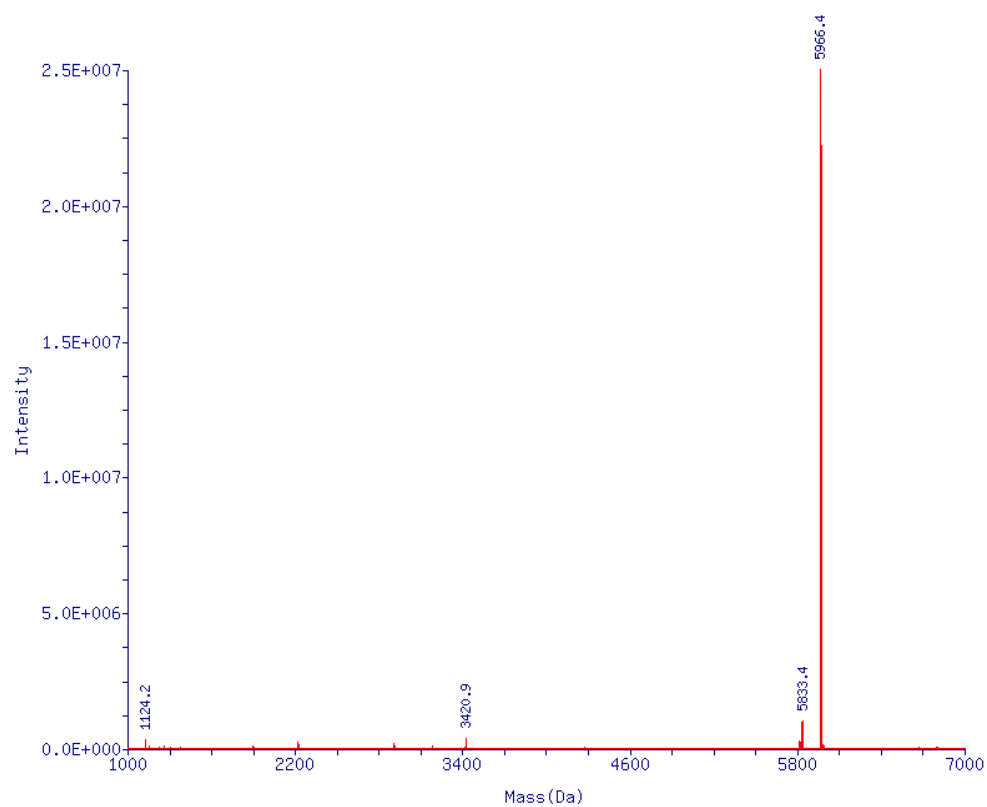

D19

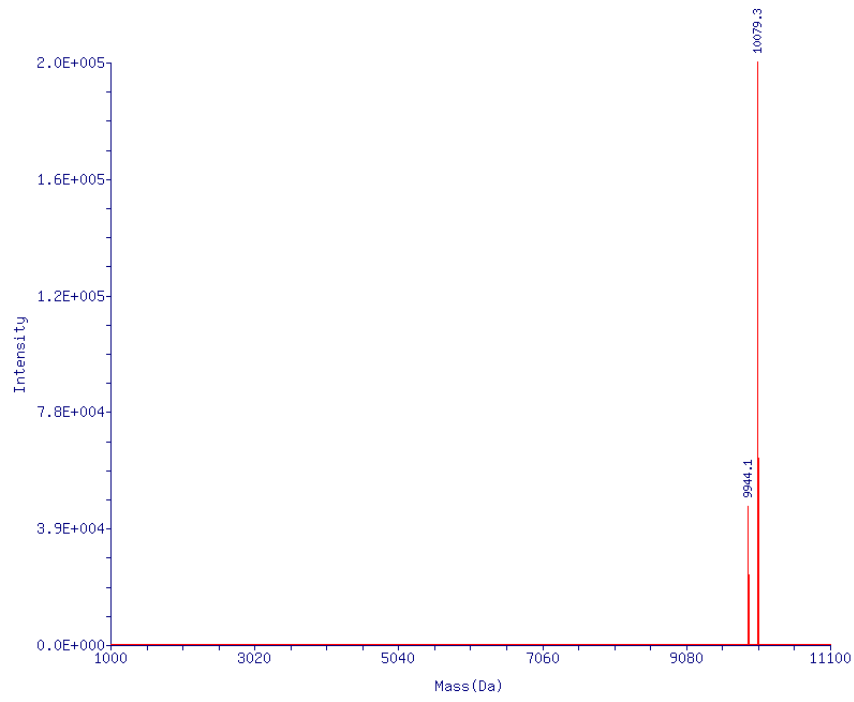

DZ-T4-4

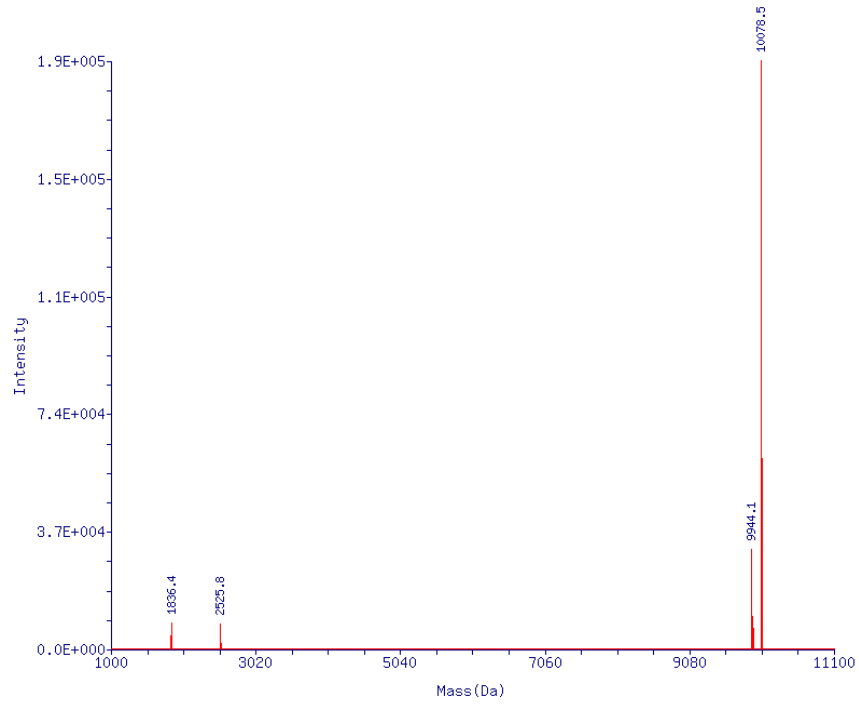

DZ-T8-4

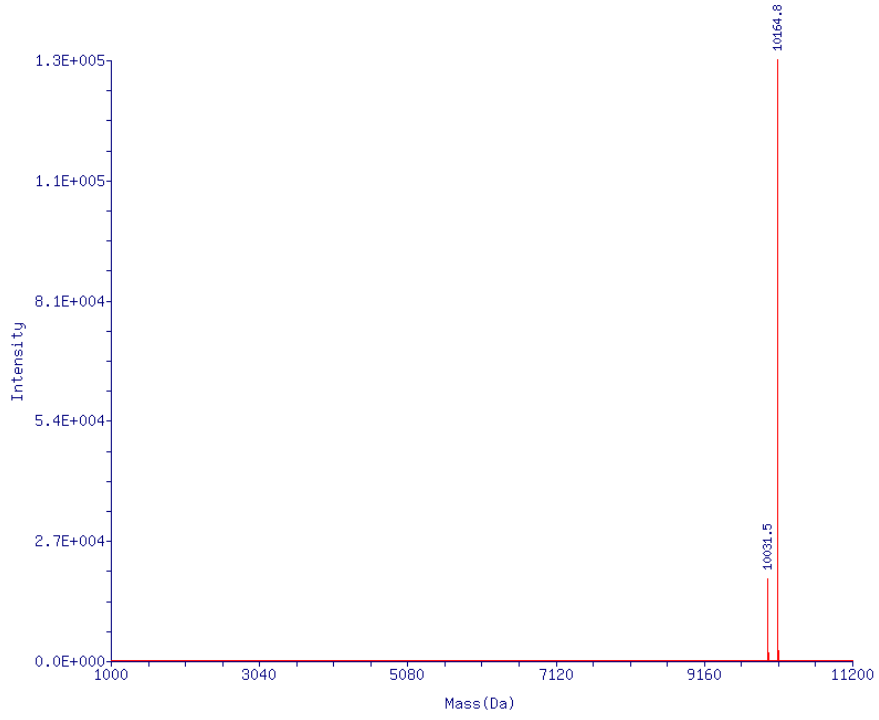

DZ-T4-T8-4

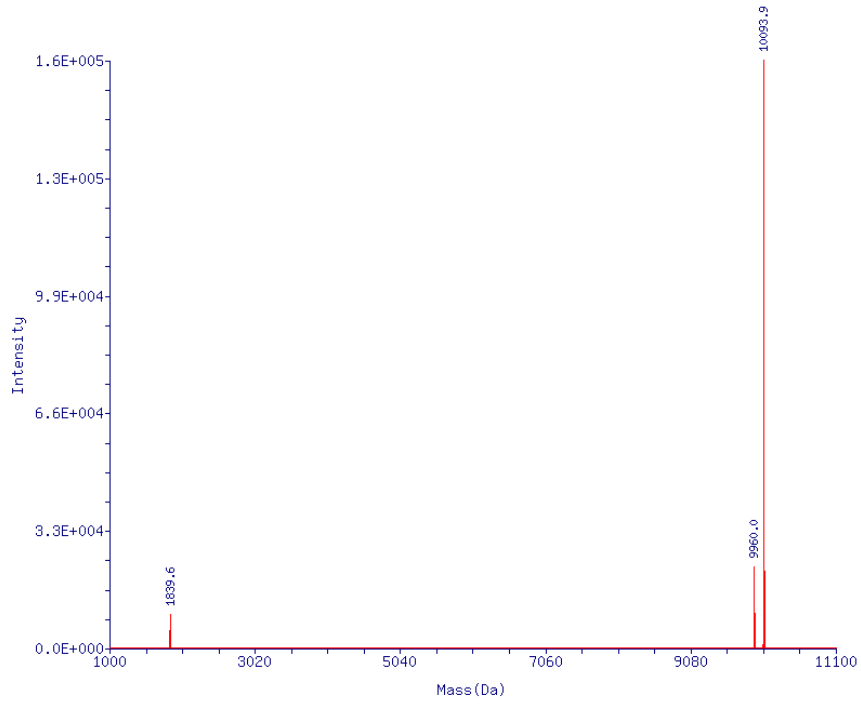

DZ-C13-4

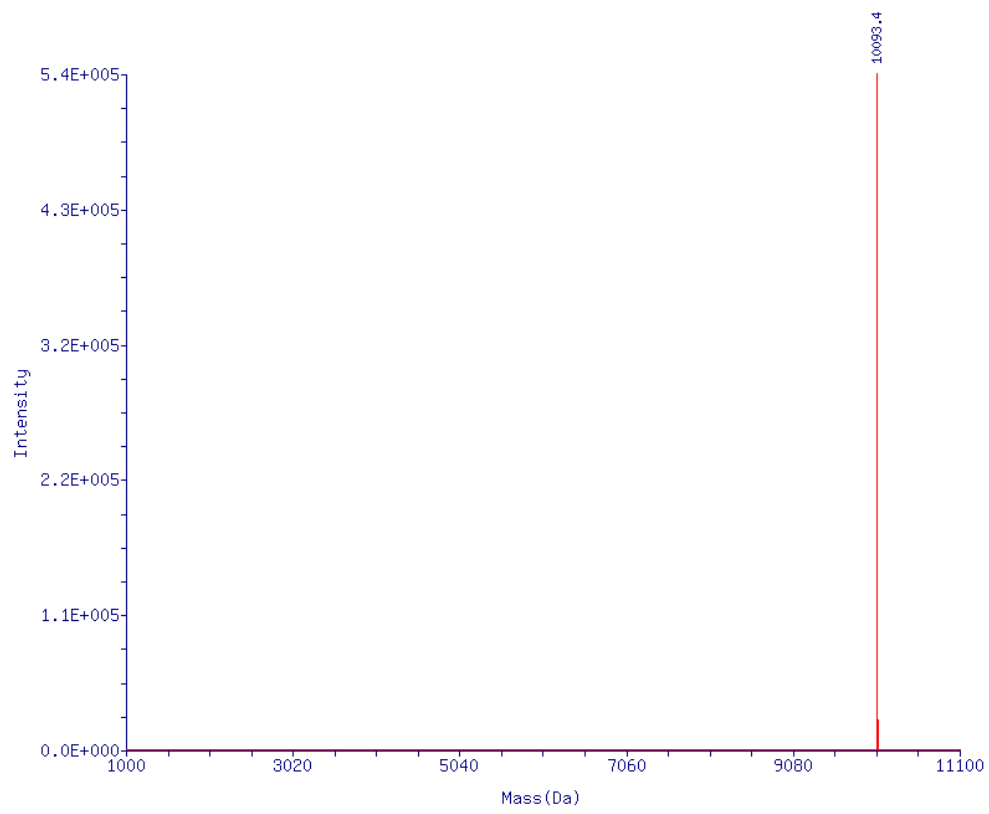

DZ-T4-5

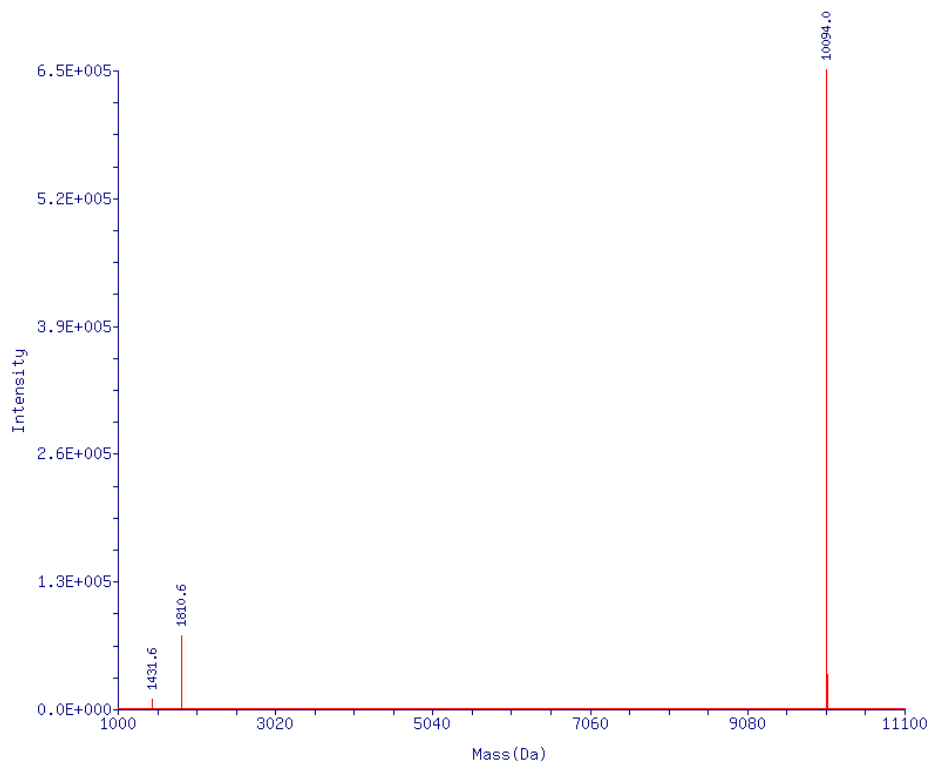

DZ-T8-5

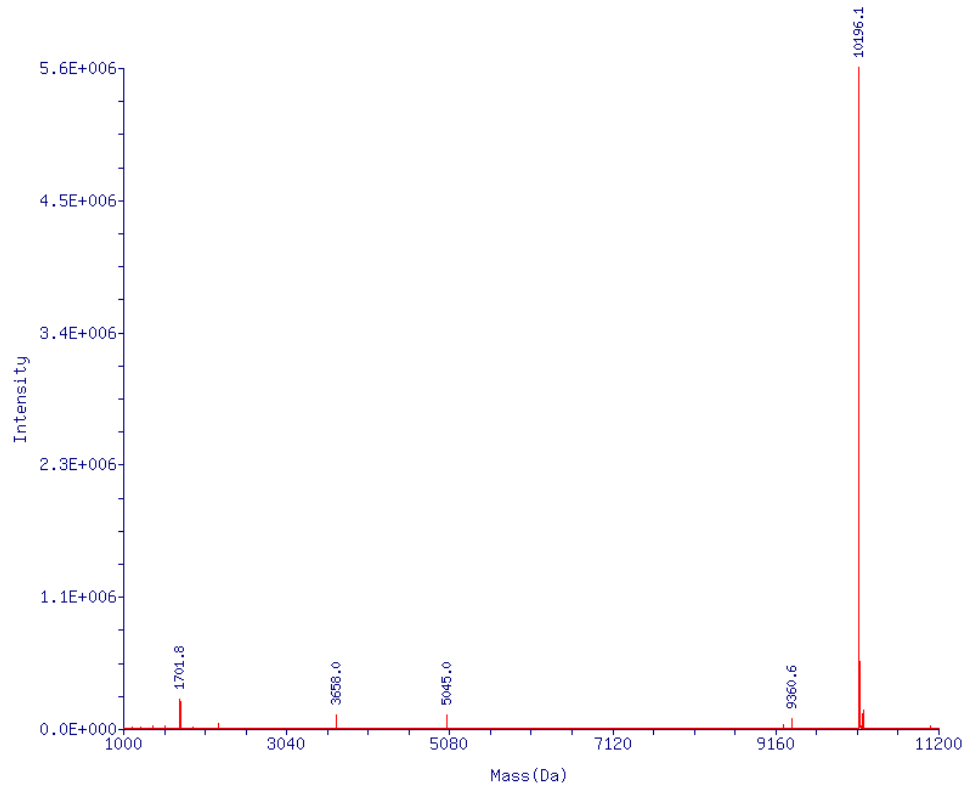

DZ-T4-T8-5

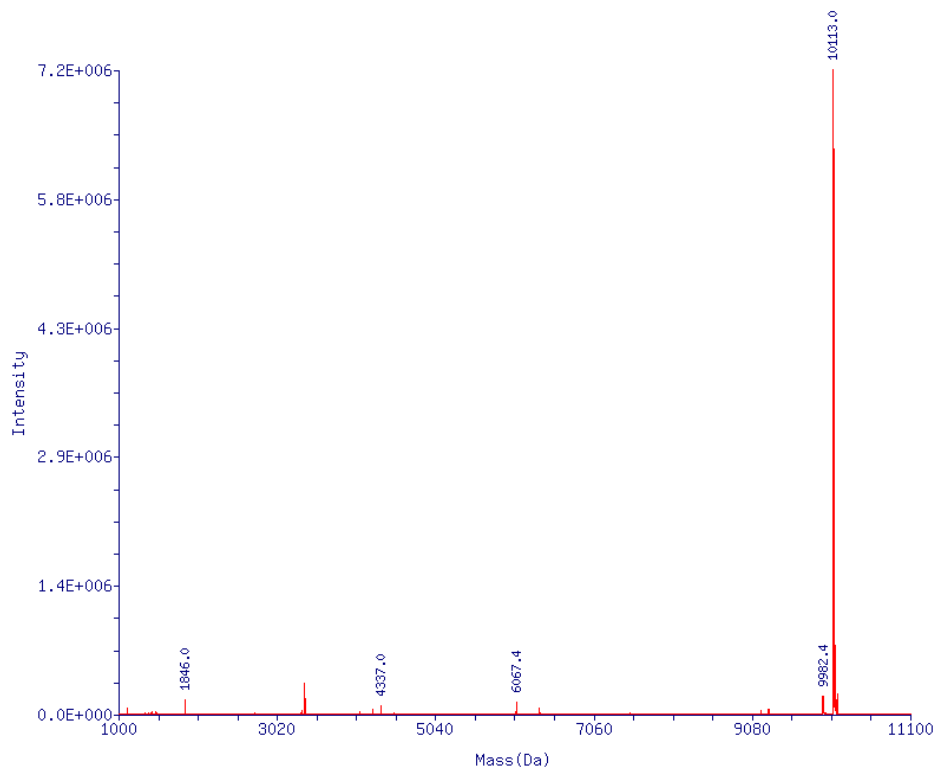

DZ-C13-5

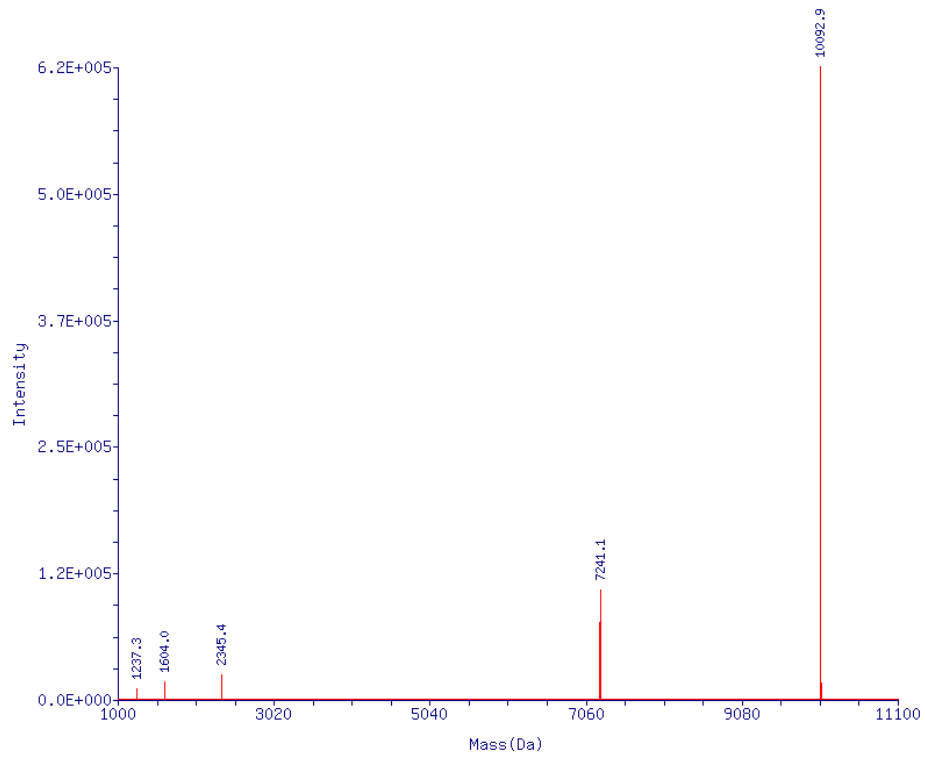

HJLP01 DZ-T4-6

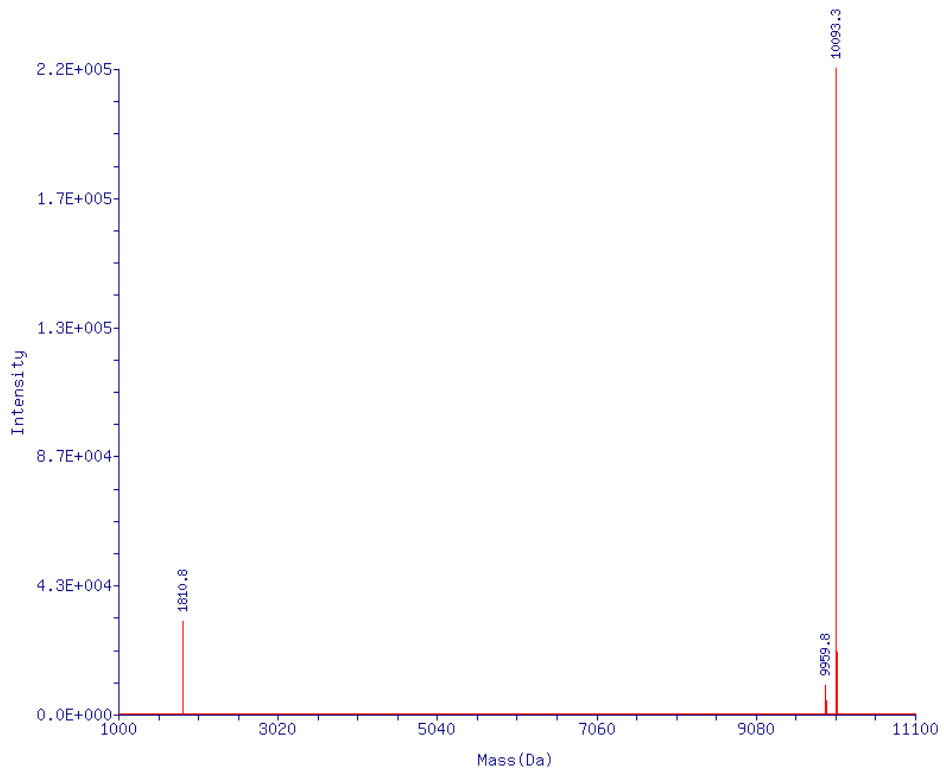

DZ-T8-6

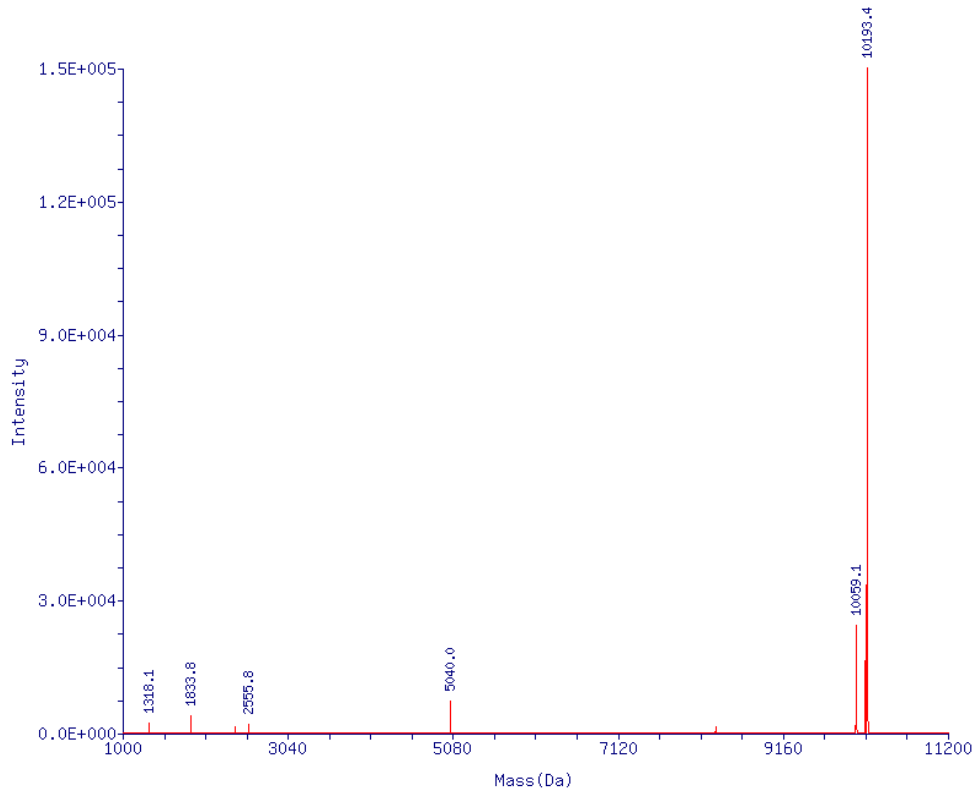

DZ-T4-T8-6

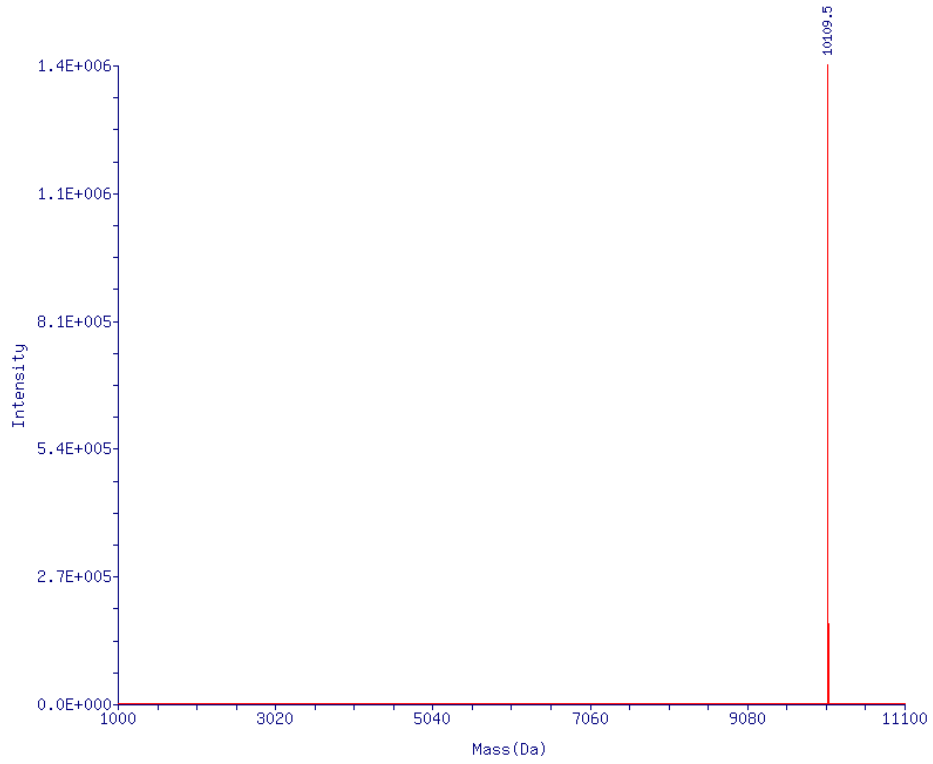

DZ-C13-6

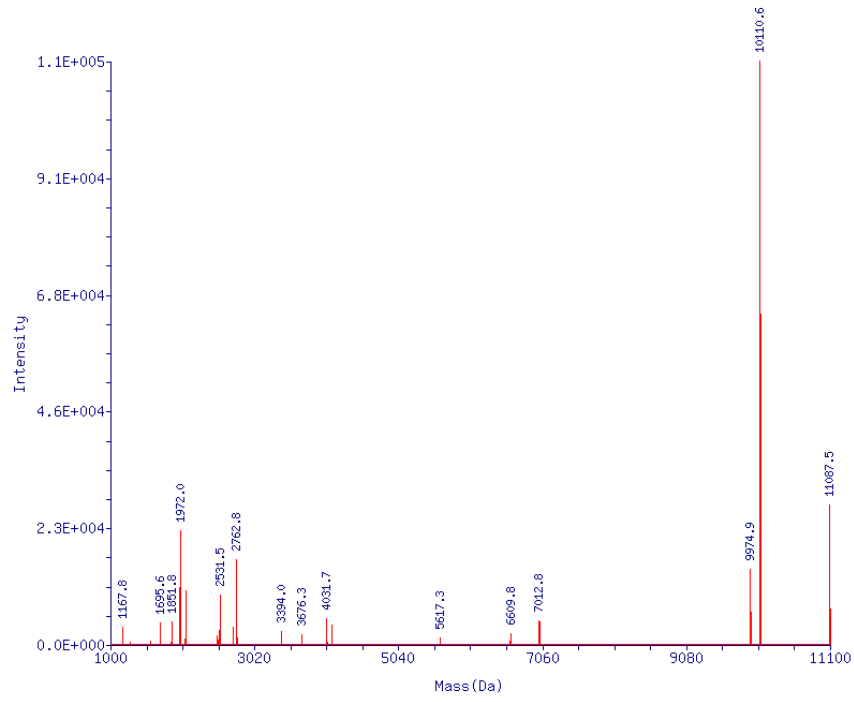

DZ-T4-7

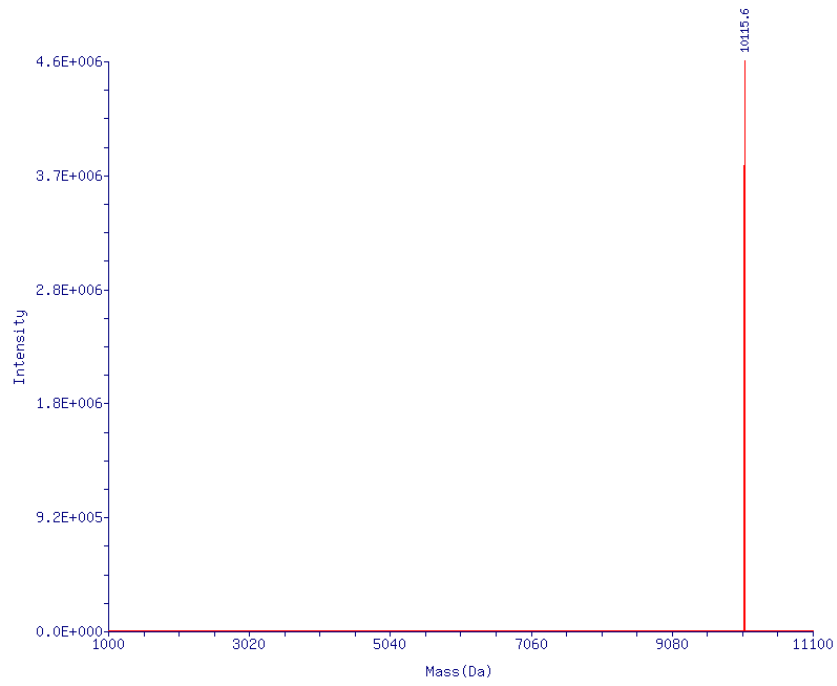

DZ-T8-7



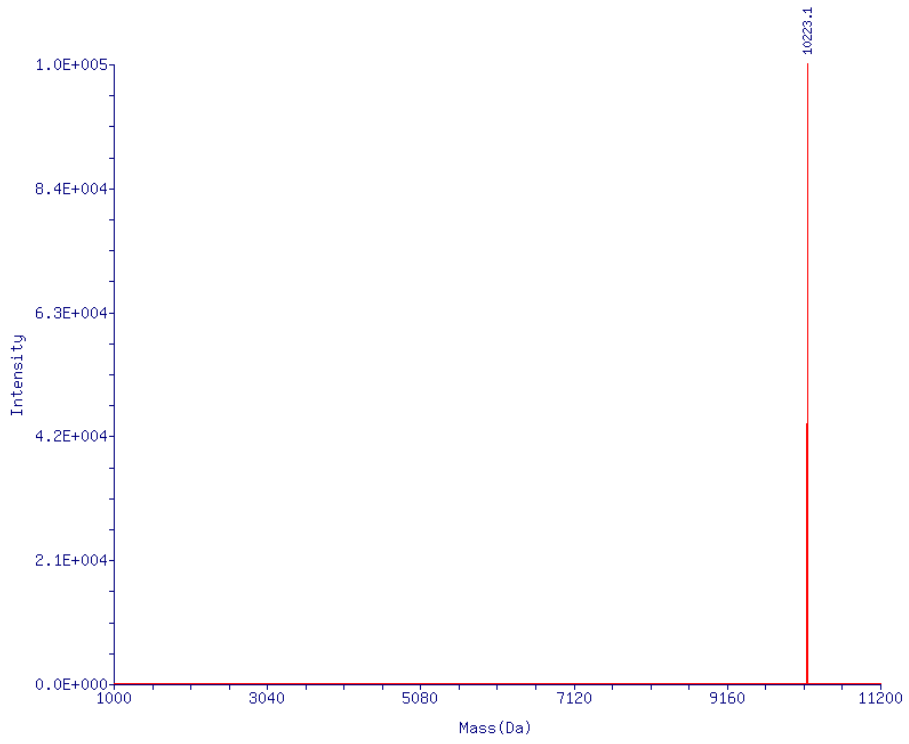

DZ-T4-T8-7

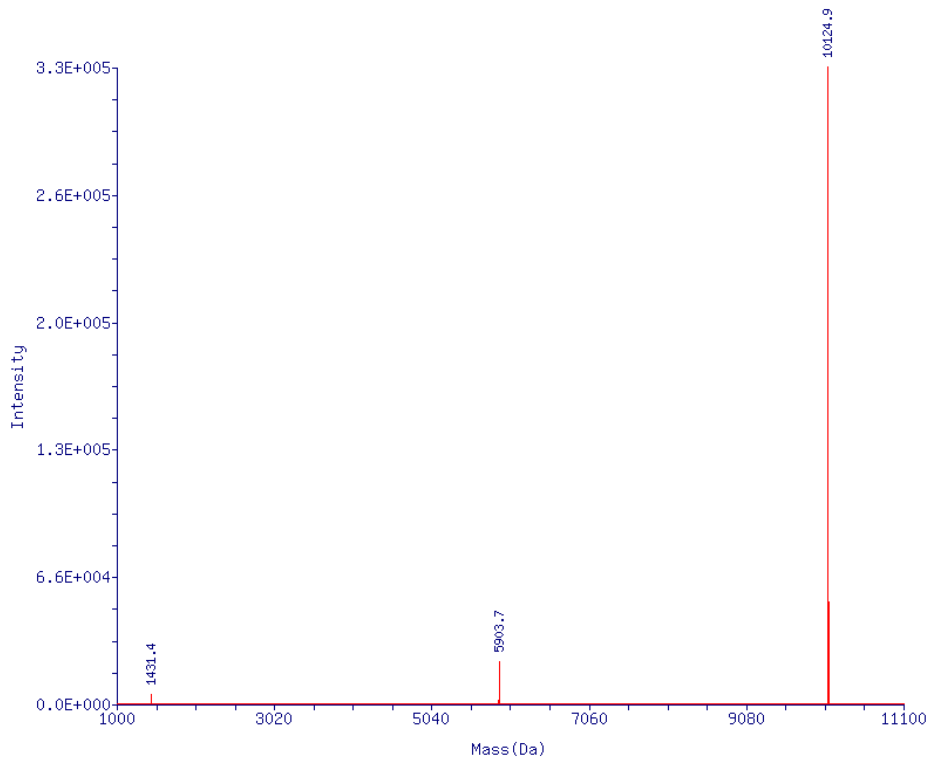

DZ-C13-7
